# Supplementary material for: Effect of GR24 on the growth and development of licorice under low phosphorus stress
Source: PeerJ. 2024 Nov 26;12:e18546. doi: 10.7717/peerj.18546 (PMC11606326; doi:10.7717/peerj.18546)
Supplement: Supplemental Information 2 [file peerj-12-18546-s002.xlsx]

## Sheet: fresh weight
fresh weight(g)
	P1G1	P1G2	P1G3	P1G4	P1G5	P2G1	P2G2	P2G3	P2G4	P2G5	P3G1	P3G2	P3G3	P3G4	P3G5
The first sample	1.797	1.428	2.937	1.695	1.324	2.043	3.899	1.801	1.963	2.923	1.85	1.231	3.268	3.229	1.922
The second sample	2.259	1.44	2.277	1.64	1.649	2.21	2.376	3.412	1.432	2.739	1.308	3.227	3.995	2.363	3.741
The third sample	1.45	1.787	2.558	1.335	2.984	2.264	2.432	3.628	2.431	2.587	1.532	3.217	2.272	2.247	2.627
The fourth sample	1.76	1.69	1.689	2.239	1.812	1.285	2.231	1.747	1.646	1.824	1.611	3.668	3.846	1.702	2.402
The fifth sample	1.39	2.054	1.913	1.704	1.822	2.353	2.045	2.889	1.279	2.501	3.064	1.496	4	1.897	1.94
Note：G1 indicates 0 μM GR24; G2 indicates 1 μM GR24; G3 means 10 μM GR24; G4 means 100 μM GR24; G5 means 1000 μM GR24
P1 represents no phosphorus, P2 represents low phosphorus, P3 represents normal phosphorus

## Sheet: dry weight
dry weight(g)
	P1G1	P1G2	P1G3	P1G4	P1G5	P2G1	P2G2	P2G3	P2G4	P2G5	P3G1	P3G2	P3G3	P3G4	P3G5
The first sample	0.603	0.58	0.718	0.72	0.735	0.797	1.119	1.07	1.196	0.721	0.788	1.232	1.535	1.325	1.111
The second sample	0.576	0.605	0.718	0.688	0.872	0.621	0.913	1.133	0.895	1.151	1.395	1.852	2.284	0.717	1.462
The third sample	0.786	0.683	0.943	0.634	0.947	0.666	1.068	1.673	0.778	1.199	0.735	1.582	1.665	1.262	1.617
The fourth sample	0.526	0.613	0.696	0.696	1.023	0.578	1.15	1.115	1.179	0.805	1.585	1.355	2.166	0.662	1.136
The fifth sample	0.764	0.663	0.902	0.603	0.921	0.616	0.88	0.987	0.81	1.047	1.297	0.79	1.358	1.268	1.317
Note：G1 indicates 0 μM GR24; G2 indicates 1 μM GR24; G3 means 10 μM GR24; G4 means 100 μM GR24; G5 means 1000 μM GR24
P1 represents no phosphorus, P2 represents low phosphorus, P3 represents normal phosphorus

## Sheet: basal stem
basel stem(mm)
		P1G1		P1G2		P1G3		P1G4		P1G5	P2G1	P2G2		P2G3		P2G4		P2G5		P3G1		P3G2		P3G3		P3G4		P3G5
The first sample		4.164		4		4.18		3		3.168	3.164	3.164		4.084		3.254		3.276		3.128		4		4.116		5.108		4.176
The second sample		2.02		3		2.184		2.172		3.004	3	3.056		3.16		3.168		4.06		3.156		6		5		5.14		5.14
The third sample		2		2.16		5.156		2.184		2.18	3.12	3.186		4.148		4.18		2.144		2.08		3.68		6.176		4.14		4.004
The fourth sample		3		3		3.196		3.06		3.08	2.244	3.884		3.164		3.16		2.092		4.084		5		5		5.168		4
The fifth sample		4		3		2.064		3.1		2.168	3.14	3.18		4		3.164		3.148		3.28		3.26		6.156		2.172		3.06
Note：G1 indicates 0 μM GR24; G2 indicates 1 μM GR24; G3 means 10 μM GR24; G4 means 100 μM GR24; G5 means 1000 μM GR24
P1 represents no phosphorus, P2 represents low phosphorus, P3 represents normal phosphorus

## Sheet: root length
root length(cm)
	P1G1	P1G2	P1G3	P1G4	P1G5	P2G1	P2G2	P2G3	P2G4	P2G5	P3G1	P3G2	P3G3	P3G4	P3G5
The first sample	21.3	22.7	24.3	24.6	26.4	20.7	37.2	30	29.9	26	29.9	34.8	38	29.2	28.5
The second sample	17.7	19.8	22.3	14	18.6	25.5	33.8	40.2	28.2	42.9	27.2	30.3	44.3	22.1	29.5
The third sample	20.5	20.3	26.9	24.1	23.2	25.5	37.8	31.8	23.5	40.1	38.8	23.9	46.6	20.4	23.7
The fourth sample	20.1	25.2	28.6	17.9	19.9	26.5	33.6	52.7	34	26.9	31.5	35.2	56.9	21.9	27.8
The fifth sample	22	20.9	19.9	13.2	24.1	26.2	20.1	47.1	42.9	29.8	31.8	39.6	32.6	24.9	27.2
Note：G1 indicates 0 μM GR24; G2 indicates 1 μM GR24; G3 means 10 μM GR24; G4 means 100 μM GR24; G5 means 1000 μM GR24
P1 represents no phosphorus, P2 represents low phosphorus, P3 represents normal phosphorus

## Sheet: root projection
root projection(cm²)																unit(cm²)
	P1G1	P1G2	P1G3	P1G4	P1G5	P2G1	P2G2	P2G3	P2G4	P2G5	P3G1	P3G2	P3G3	P3G4	P3G5
The first sample	7.303	6.946	8.624	6.234	7.213	9.632	11.883	13.425	8.341	11.296	10.853	14.179	16.411	13.625	14.614
The second sample	5.487	7.12	7.1	5.77	8.202	9.654	12.599	11.767	8.685	10.314	11.928	15.193	19.077	13.241	17.597
The third sample	7.671	6.365	6.569	7.515	7.376	9.212	10.306	11.837	12.433	10.835	10.178	16.037	19.151	14.06	15.151
The fourth sample	5.345	8.39	8.266	5.754	6.173	9.998	11.179	13.694	10.156	11.733	12.011	16.876	14.614	15.86	14.634
The fifth sample	7.438	6.92	6.547	6.371	9.297	9.778	11.481	13.645	10.134	10.913	12.326	17.511	14.567	13.043	14.567
Note：G1 indicates 0 μM GR24; G2 indicates 1 μM GR24; G3 means 10 μM GR24; G4 means 100 μM GR24; G5 means 1000 μM GR24
P1 represents no phosphorus, P2 represents low phosphorus, P3 represents normal phosphorus

## Sheet: chlorophll content
chlorophll a(mg/g)	P1G1	P1G2	P1G3	P1G4	P1G5	P2G1	P2G2	P2G3	P2G4	P2G5	P3G1	P3G2	P3G3	P3G4	P3G5
The first sample	1.33562	1.9833	1.46167	1.39294	1.20084	1.49356	2.12907	2.36495	1.96428	2.47292	2.20438	2.66092	2.79725	2.56762	2.02832
The second sample	1.40127	1.23958	1.23884	1.3234	1.40633	1.61078	1.71341	2.50312	1.97649	2.17071	2.25763	2.56864	2.85806	2.44587	2.31346
The third sample	1.17168	1.50298	1.87915	1.55696	1.85113	1.61336	1.6255	2.65935	1.93927	2.08098	1.73837	2.43259	2.76076	2.09394	2.32394
The fourth sample	1.66642	1.24862	1.37401	1.35427	1.31613	1.38356	1.76811	2.25991	2.03203	2.05206	1.89646	2.56286	2.94453	2.47788	2.15056
The fifth sample	1.55204	1.44543	1.76645	1.54049	1.41573	1.69133	1.60017	1.90736	2.10368	2.08098	2.37407	2.38206	2.74596	2.06088	2.36596
chlorophll b(mg/g)
The first sample	1.30153	1.35642	1.65628	1.18503	1.27139	1.36156	1.52528	1.62231	0.852075	0.953915	0.792871	1.08909	1.89771	1.57821	0.849478
The second sample	1.08235	1.15026	1.00836	1.39941	1.0573	1.33835	1.61297	1.91875	0.866732	1.05121	1.31581	1.57821	1.84226	1.08909	1.01841
The third sample	0.967887	1.01332	1.56784	1.36464	1.3973	1.32119	1.47267	1.36899	0.804609	1.17739	0.604507	1.12512	1.64328	2.15479	1.01001
The fourth sample	0.838183	1.15826	0.944895	0.912367	1.16873	1.54373	1.56811	1.5938	0.787063	0.948798	1.06253	1.5824	1.72817	1.81021	0.743579
The fifth sample	1.02841	1.32243	1.1	1.58559	1.28401	1.26227	1.12975	1.56388	0.891628	0.948798	1.14656	1.44657	1.71997	1.70899	0.925152
Note：G1 indicates 0 μM GR24; G2 indicates 1 μM GR24; G3 means 10 μM GR24; G4 means 100 μM GR24; G5 means 1000 μM GR24
P1 represents no phosphorus, P2 represents low phosphorus, P3 represents normal phosphorus

## Sheet: antioxidant enzyme activities
SOD(U/g FW)	P1G1	P1G2	P1G3	P1G4	P1G5	P2G1	P2G2	P2G3	P2G4	P2G5	P3G1	P3G2	P3G3	P3G4	P3G5
The first sample	789.773	945.799	742.729	750	750	666.667	765.579	676.056	652.778	625.683	444.444	479.769	629.63	284.528	444.444
The second sample	876.783	837.398	754.386	649.215	734.982	572.917	643.646	797.583	820.809	500	417.122	300.813	613.821	381.579	554.455
The third sample	714.912	853.129	860.681	684.492	770.531	584.648	685.552	859.375	648.199	546.381	540.23	460.227	650	385.266	578.313
The fourth sample	730.047	972.452	742.729	721.311	781.022	529.126	719.653	637.681	602.201	533.991	417.122	677.966	668.911	374.453	569.758
The fifth sample	705.882	810.379	768.519	888.889	725.146	582.915	714.697	742.729	842.105	526.515	517.413	517.413	675.105	321.805	466.667
POD(U/g FW)
The first sample	3424	3424	3210	3210	3424	2568	2853.33	2853.33	2853.33	2568	1498	1926	2140	2140	1712
The second sample	3210	2996	2996	2996	2996	2282.67	2853.33	3138.67	2568	2568	1926	1712	1926	1926	1712
The third sample	3852	3638	3210	3424	3638	2568	2568	2853.33	2282.67	2282.67	1498	2140	2282.67	1712	1926
The fourth sample	3638	3638	3852	3638	3638	2568	2568	3138.67	2568	2853.33	1712	1926	1926	1926	1712
The fifth sample	3638	3852	3638	3092.3	3210	2282.67	2853.33	2853.33	2282.67	2282.67	1498	1712	2140	2140	1712
CAT(U/g FW)
The first sample	889.035	689.002	963.121	807.54	966.825	622.324	600.098	644.55	688.446	577.872	400.066	400.066	655.663	689.602	313.456
The second sample	955.712	854.167	844.583	711.228	752.294	622.324	577.872	689.002	622.324	511.195	300.049	577.872	606.766	466.743	414.883
The third sample	844.583	989.051	903.852	731.231	800.131	533.421	770.497	744.566	555.647	511.195	376.147	533.421	508.139	438.838	438.838
The fourth sample	933.486	800.131	726.045	822.357	833.47	577.872	644.55	600.098	666.776	533.421	344.801	501.529	488.969	689.602	466.743
The fifth sample	800.131	889.035	830.657	822.357	844.583	644.55	629.733	777.905	577.872	600.098	377.84	477.856	533.421	444.517	366.727
Note：G1 indicates 0 μM GR24; G2 indicates 1 μM GR24; G3 means 10 μM GR24; G4 means 100 μM GR24; G5 means 1000 μM GR24
P1 represents no phosphorus, P2 represents low phosphorus, P3 represents normal phosphorus

## Sheet: medicinal component
		Glabridin(μg/g）	Glycyrrhetic acid(μg/g)	Isoliquiritigenin(μg/g）	Liquiritigenin(μg/g）	liquiritin(μg/g）	Isoliquiritin(μg/g）	Glycyrrhizic acid(mg/g）
The first sample	P1G1	5.79	0.19	0.7425	11.4375	25.9075	1.54	0.7745
The second sample		4.03	0.215	0.515	10.9475	26.0525	1.545	0.81175
The third sample		4.34	0.1225	0.6225	9.315	24.59	1.1375	0.5105
The first sample	P1G3	5.0325	0.1325	1.5825	7.4475	34.385	1.235	0.80325
The second sample		7.3625	0.39	1.8925	9.9275	30.8125	1.525	1.08975
The third sample		5.4625	0.14	1.445	8.68	29.68	1.1925	0.8615
The first sample	P2G1	4.7075	0.14	1.19	4.09	23.215	2.645	0.59375
The second sample		3.105	0.1575	1.8775	3.345	16.49	1.95	0.6275
The third sample		3.49	0.1475	1.8775	3.9675	17.9675	2.0525	0.61675
The first sample	P2G3	2.8725	0.15	2.23	8.735	50.735	5.8	0.79975
The second sample		3.9575	0.125	1.7575	7.94	45.565	5.435	0.8605
The third sample		2.4875	0.16	1.9325	8.2675	45.565	4.14	0.62225
The first sample	P3G1	3.2275	0.185	2.905	5.4425	34.5475	3.4975	1.3525
The second sample		4	0.2175	2.2875	4.2875	29.28	3.105	1.2025
The third sample		4.17	0.2375	2.35	4.8475	30.6975	2.4675	1.033
The first sample	P3G3	3.2675	0.15	1.1625	7.575	28.82	3.065	1.565
The second sample		3.8425	0.155	1.115	8.705	31.715	3.79	1.33125
The third sample		3.075	0.1375	1.13	8.8225	32.9425	3.8175	1.45475
Note：G1 indicates 0 μM GR24; G2 indicates 1 μM GR24; G3 means 10 μM GR24; G4 means 100 μM GR24; G5 means 1000 μM GR24
P1 represents no phosphorus, P2 represents low phosphorus, P3 represents normal phosphorus
